# Supplementary material for: Copper hydrotris(3,5-diphenylpyrazolyl)borate dithiocarbamates: mimicking green copper proteins
Source: Royal Society of Chemistry journal article supplement (doi:10.1039/c4nj01298d), 2014-12-11
Supplement: c4nj01298d1.pdf [file c4nj01298d1.pdf]

## Supplementary Material for:

### **Copper hydrotris(3,5-diphenylpyrazolyl)borate dithiocarbamates: mimicking copper green proteins**

David J. Harding,<sup>a\*</sup> Wasinee Phonsri,<sup>a</sup> Phimpaka Harding,<sup>a</sup> Jitnapa Sirirak,<sup>a</sup> Yuthana Tangtirungrotechai,<sup>b</sup> Richard D. Webster<sup>c</sup> and Harry Adams<sup>d</sup>

<sup>a</sup>Molecular Technology Research Unit Cell, Walailak University, Thasala, Nakhon Si Thammarat, 80161, Thailand. E-mail: hdavid@wu.ac.th

<sup>b</sup>Department of Chemistry, Faculty of Science and Technology, Thammasat University, 99 Paholyothin Rd., Khlong 1, Khlong Luang, Pathum Thani, 12120, Thailand

<sup>c</sup>Division of Chemistry and Biological Chemistry, School of Physical and Mathematical Sciences, Nanyang Technological University, Singapore 637371

<sup>d</sup>Department of Chemistry, University of Sheffield, Sheffield, S3 7HF, United Kingdom

## Supporting Figures and Tables

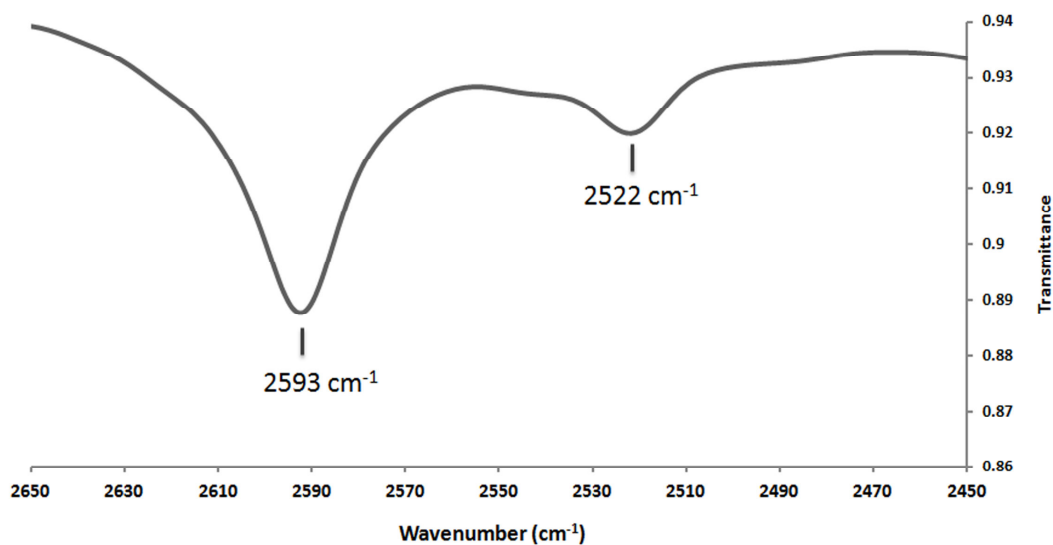

**Figure S1** IR spectrum of [Tp<sup>Ph</sup><sub>2</sub>Cu(S<sub>2</sub>CN(CH<sub>2</sub>)<sub>4</sub>)] **3** in the B-H region in CH<sub>2</sub>Cl<sub>2</sub>.

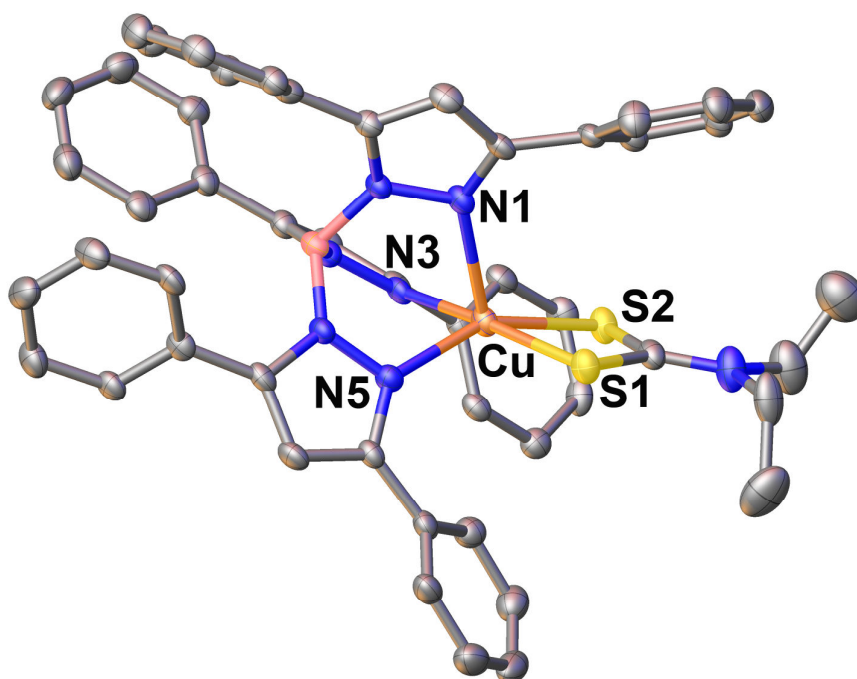

**Figure S2** Structure of [Tp<sup>Ph</sup><sub>2</sub>Cu(S<sub>2</sub>CNEt<sub>2</sub>)] **1**. Hydrogen atoms are omitted and only selected atoms labelled in the interests of clarity.

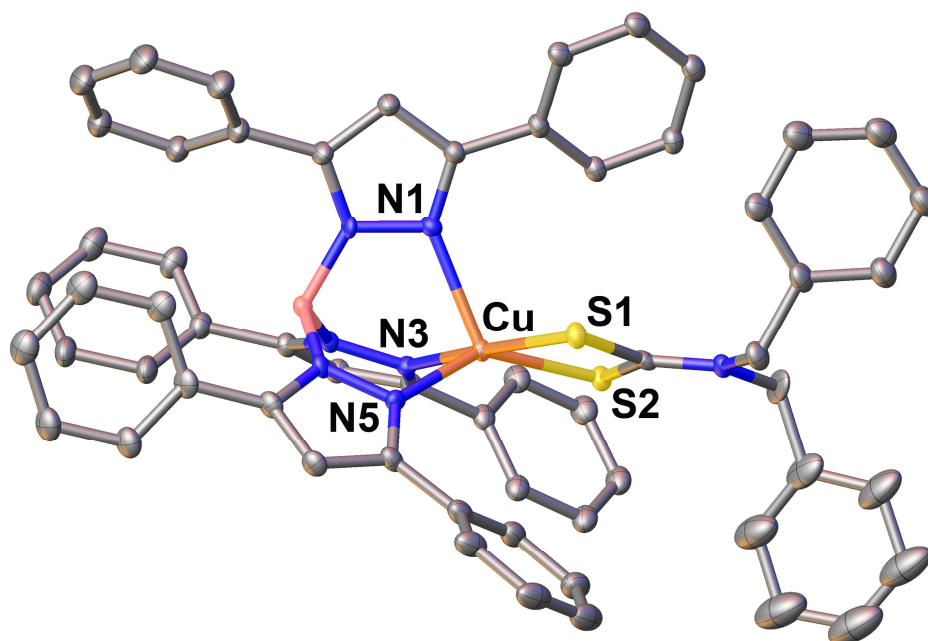

**Figure S3** Structure of  $[\text{Tp}^{\text{Ph}_2}\text{Cu}(\text{S}_2\text{CNBz}_2)]$  **2**. Hydrogen atoms are omitted and only selected atoms labelled in the interests of clarity.

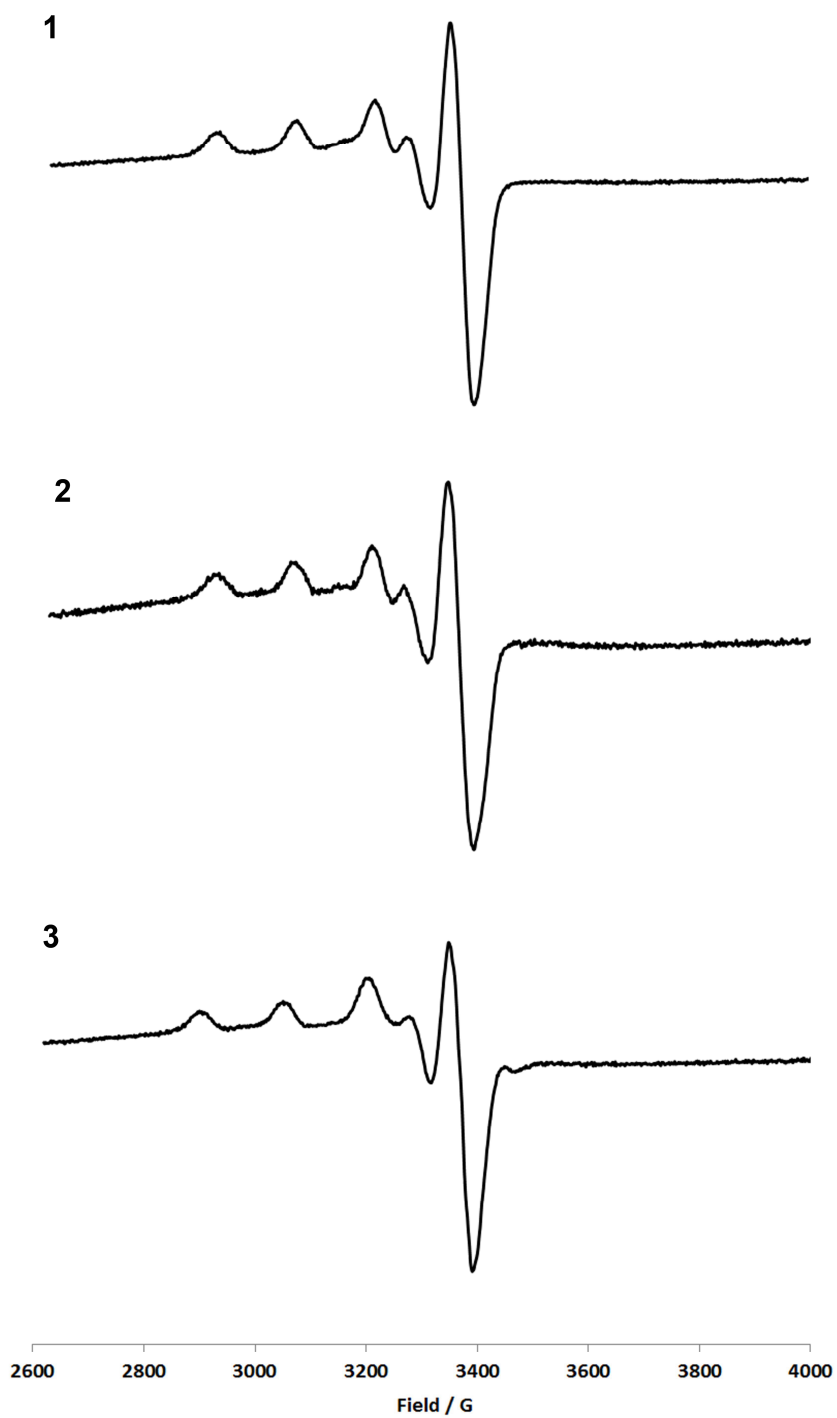

**Figure S4** ESR spectra of **1**, **2** and **3** in frozen  $\text{CH}_2\text{Cl}_2$  at 150 K.

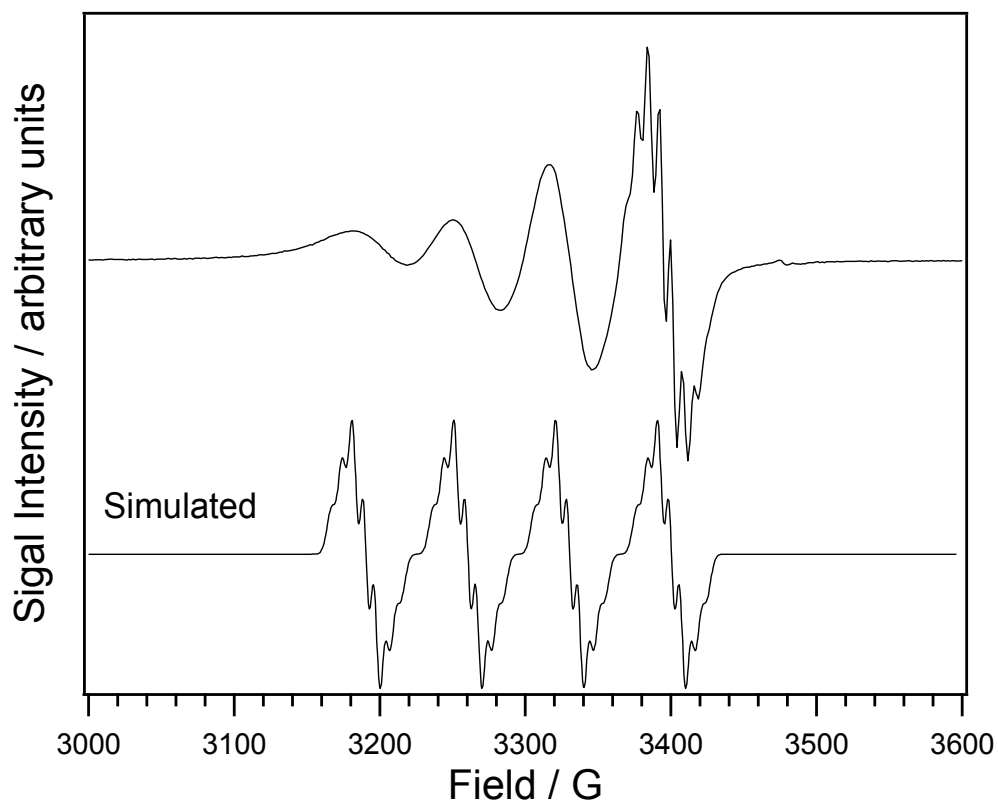

Figure S5 Simulated spectrum of  $[\text{Tp}^{\text{Ph}_2}\text{Cu}(\text{S}_2\text{CN}(\text{CH}_2)_4)] \mathbf{3}$  at 295 K.

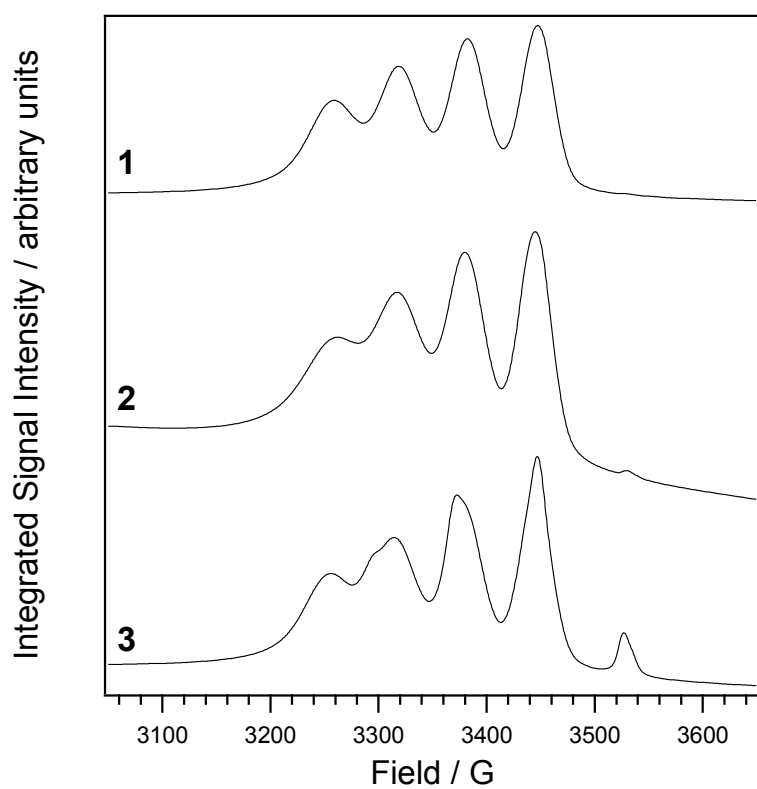

Figure S6 Integrated ESR spectrum of  $[\text{Tp}^{\text{Ph}_2}\text{Cu}(\text{dtc})] \mathbf{1-3}$  at 295 K.

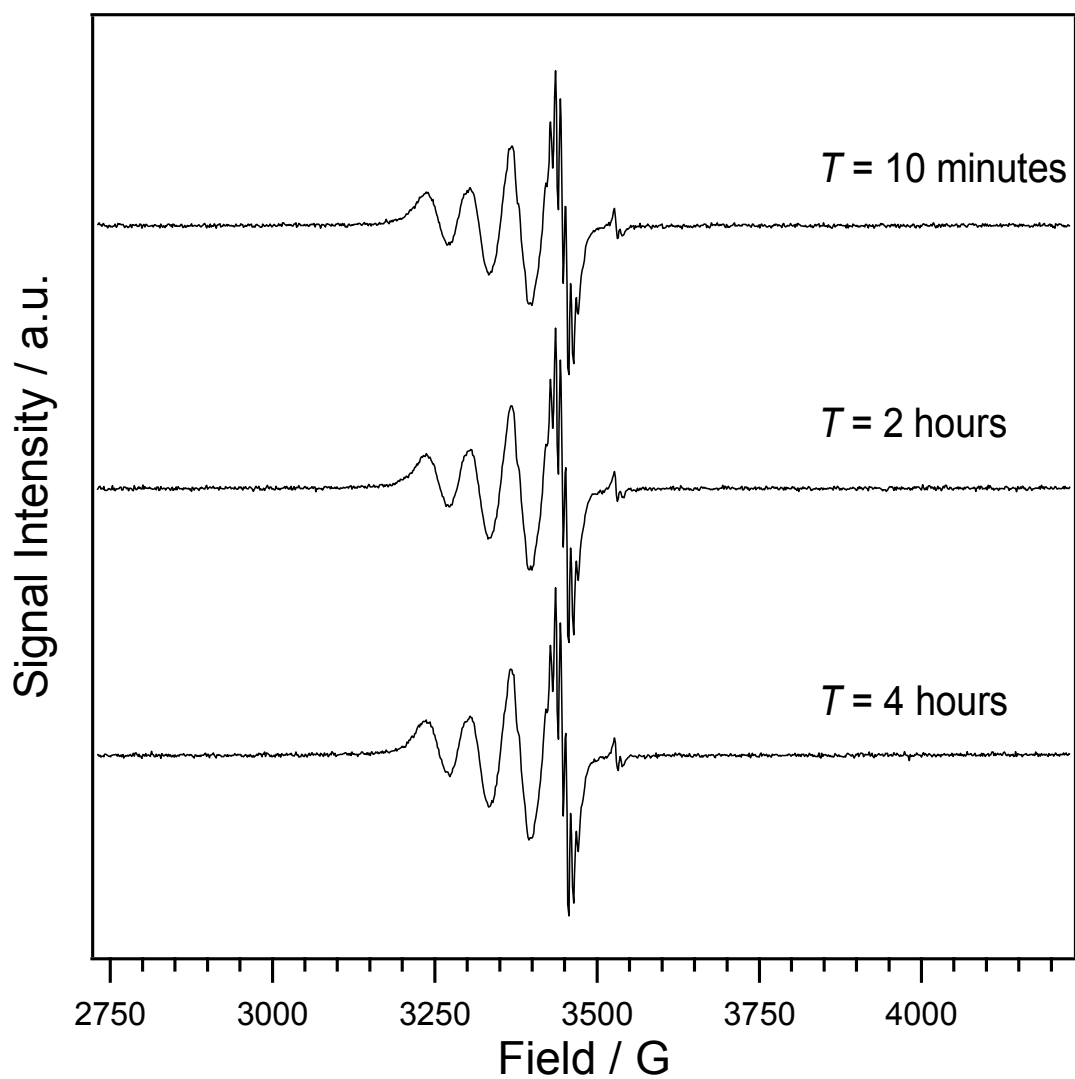

**Figure S7** X-band EPR spectra of 1 mM of **3** dissolved in  $\text{CH}_2\text{Cl}_2$  at different times after dissolution at room temperature. The modulation amplitude = 1.0 G, sweep time = 60 s and microwave power = 0.63 mW.

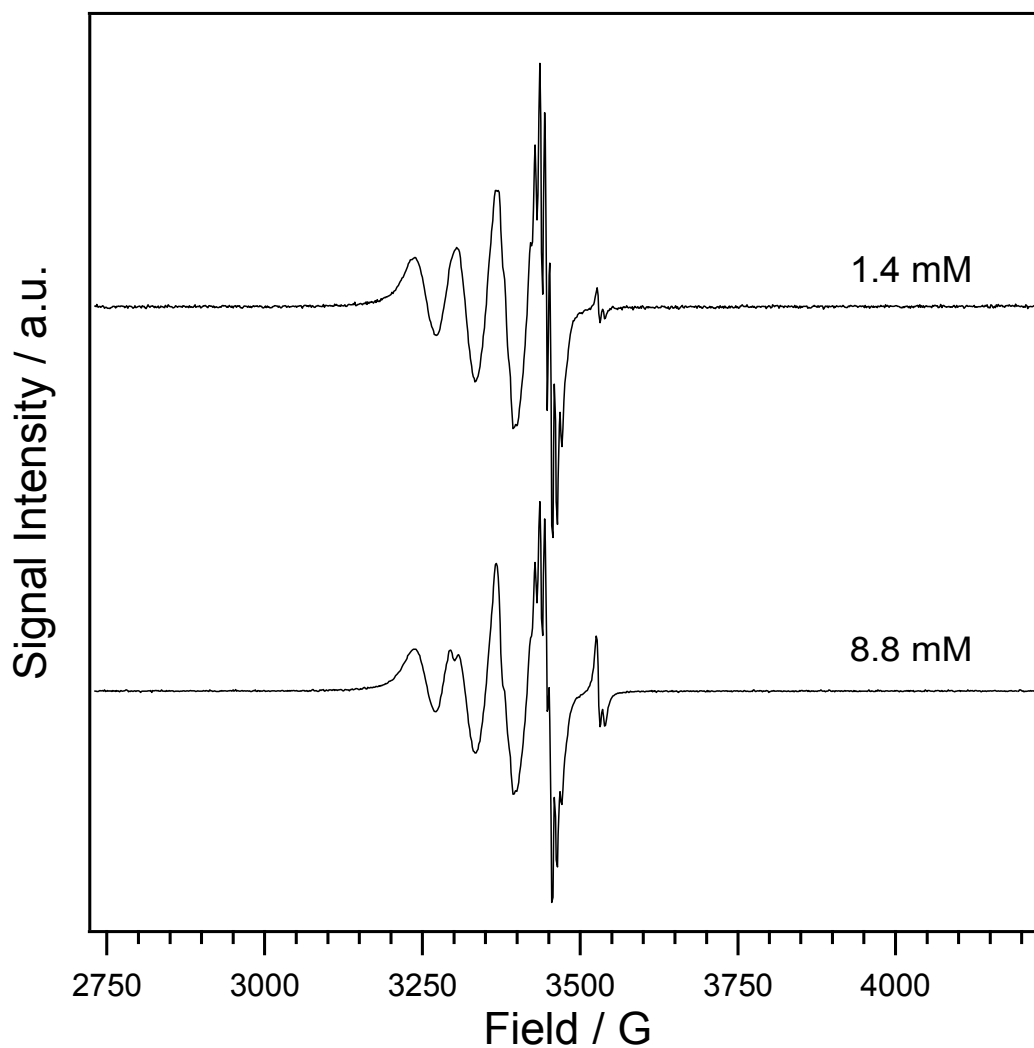

**Figure S8** X-band EPR spectra of **3** dissolved in  $\text{CH}_2\text{Cl}_2$  at different concentrations at room temperature. The modulation amplitude = 1.0 G, sweep time = 60 s and microwave power = 0.63 mW. The signal intensity has been normalised so they are the same size.

**Table S1** Coordinates for [Tp<sup>Ph2</sup>Cu(S<sub>2</sub>CNEt<sub>2</sub>)] **1**.

|    |     |       |       |       |    |     |       |       |       |     |      |      |       |       |
|----|-----|-------|-------|-------|----|-----|-------|-------|-------|-----|------|------|-------|-------|
| 1  | Cu1 | 1.12  | 0.06  | 0.08  | 46 | H46 | 0.91  | 4.41  | -3.23 | 91  | C91  | 3.86 | -0.14 | -0.61 |
| 2  | S2  | 3.31  | -0.15 | 1.04  | 47 | C47 | 1.39  | 0.17  | 3.82  | 92  | C92  | 5.61 | -0.25 | -2.33 |
| 3  | S3  | 2.62  | 0.03  | -1.79 | 48 | C48 | 1.78  | -0.81 | 4.74  | 93  | H93  | 4.82 | -0.70 | -2.94 |
| 4  | B4  | -1.91 | 0.04  | 0.04  | 49 | H49 | 1.19  | -1.72 | 4.84  | 94  | H94  | 6.48 | -0.91 | -2.39 |
| 5  | H5  | -3.09 | 0.05  | 0.03  | 50 | C50 | 2.93  | -0.64 | 5.51  | 95  | C95  | 5.95 | 1.15  | -2.85 |
| 6  | N6  | -1.41 | -1.28 | -0.63 | 51 | H51 | 3.23  | -1.42 | 6.21  | 96  | H96  | 5.08 | 1.81  | -2.80 |
| 7  | N7  | -0.08 | -1.57 | -0.61 | 52 | C52 | 3.70  | 0.52  | 5.38  | 97  | H97  | 6.29 | 1.09  | -3.89 |
| 8  | N8  | -0.06 | 1.59  | -0.68 | 53 | H53 | 4.59  | 0.65  | 5.98  | 98  | H98  | 6.75 | 1.61  | -2.26 |
| 9  | N9  | -1.39 | 1.30  | -0.71 | 54 | C54 | 3.31  | 1.51  | 4.48  | 99  | C99  | 6.21 | -0.34 | 0.09  |
| 10 | N10 | -0.04 | 0.16  | 1.76  | 55 | H55 | 3.90  | 2.41  | 4.38  | 100 | H100 | 7.09 | 0.19  | -0.30 |
| 11 | N11 | -1.38 | 0.08  | 1.50  | 56 | C56 | 2.16  | 1.34  | 3.71  | 101 | H101 | 5.87 | 0.19  | 0.98  |
| 12 | N12 | 5.16  | -0.24 | -0.93 | 57 | H57 | 1.85  | 2.11  | 3.02  | 102 | C102 | 6.57 | -1.79 | 0.45  |
| 13 | C13 | -2.09 | -2.22 | -1.34 | 58 | C58 | 1.37  | -3.41 | -1.43 | 103 | H103 | 5.70 | -2.30 | 0.87  |
| 14 | C14 | -1.15 | -3.14 | -1.80 | 59 | C59 | 1.69  | -4.09 | -2.62 | 104 | H104 | 7.38 | -1.80 | 1.18  |
| 15 | H15 | -1.36 | -4.05 | -2.34 | 60 | H60 | 1.00  | -4.02 | -3.46 | 105 | H105 | 6.90 | -2.35 | -0.44 |
| 16 | C16 | 0.09  | -2.71 | -1.30 | 61 | C61 | 2.87  | -4.81 | -2.74 |     |      |      |       |       |
| 17 | C17 | 0.10  | 2.81  | -1.22 | 62 | H62 | 3.10  | -5.32 | -3.68 |     |      |      |       |       |
| 18 | C18 | -1.15 | 3.32  | -1.61 | 63 | C63 | 3.76  | -4.89 | -1.67 |     |      |      |       |       |
| 19 | H19 | -1.36 | 4.27  | -2.06 | 64 | H64 | 4.68  | -5.46 | -1.76 |     |      |      |       |       |
| 20 | C20 | -2.08 | 2.34  | -1.26 | 65 | C65 | 3.45  | -4.23 | -0.48 |     |      |      |       |       |
| 21 | C21 | 0.11  | 0.03  | 3.09  | 66 | H66 | 4.13  | -4.29 | 0.37  |     |      |      |       |       |
| 22 | C22 | -1.14 | -0.17 | 3.70  | 67 | C67 | 2.27  | -3.50 | -0.36 |     |      |      |       |       |
| 23 | H23 | -1.35 | -0.24 | 4.75  | 68 | H68 | 2.04  | -3.00 | 0.58  |     |      |      |       |       |
| 24 | C24 | -2.07 | -0.11 | 2.66  | 69 | C69 | -3.54 | 2.41  | -1.44 |     |      |      |       |       |
| 25 | C25 | -3.55 | -2.28 | -1.55 | 70 | C70 | -4.22 | 3.57  | -1.04 |     |      |      |       |       |
| 26 | C26 | -4.46 | -2.21 | -0.48 | 71 | H71 | -3.66 | 4.37  | -0.57 |     |      |      |       |       |
| 27 | H27 | -4.10 | -2.06 | 0.53  | 72 | C72 | -5.60 | 3.69  | -1.23 |     |      |      |       |       |
| 28 | C28 | -5.83 | -2.33 | -0.71 | 73 | H73 | -6.11 | 4.60  | -0.91 |     |      |      |       |       |
| 29 | H29 | -6.52 | -2.27 | 0.13  | 74 | C74 | -6.32 | 2.65  | -1.82 |     |      |      |       |       |
| 30 | C30 | -6.31 | -2.55 | -2.00 | 75 | H75 | -7.39 | 2.75  | -1.97 |     |      |      |       |       |
| 31 | H31 | -7.38 | -2.65 | -2.18 | 76 | C76 | -5.65 | 1.50  | -2.23 |     |      |      |       |       |
| 32 | C32 | -5.42 | -2.64 | -3.07 | 77 | H77 | -6.20 | 0.68  | -2.69 |     |      |      |       |       |
| 33 | H33 | -5.78 | -2.81 | -4.08 | 78 | C78 | -4.28 | 1.38  | -2.05 |     |      |      |       |       |
| 34 | C34 | -4.05 | -2.51 | -2.84 | 79 | H79 | -3.77 | 0.48  | -2.38 |     |      |      |       |       |
| 35 | H35 | -3.35 | -2.57 | -3.67 | 80 | C80 | -3.54 | -0.19 | 2.79  |     |      |      |       |       |
| 36 | C36 | 1.40  | 3.50  | -1.33 | 81 | C81 | -4.40 | 0.77  | 2.23  |     |      |      |       |       |
| 37 | C37 | 2.38  | 3.39  | -0.34 | 82 | H82 | -3.98 | 1.59  | 1.65  |     |      |      |       |       |
| 38 | H38 | 2.20  | 2.77  | 0.53  | 83 | C83 | -5.77 | 0.69  | 2.42  |     |      |      |       |       |
| 39 | C39 | 3.58  | 4.09  | -0.45 | 84 | H84 | -6.42 | 1.44  | 1.97  |     |      |      |       |       |
| 40 | H40 | 4.33  | 4.00  | 0.33  | 85 | C85 | -6.32 | -0.35 | 3.17  |     |      |      |       |       |
| 41 | C41 | 3.82  | 4.91  | -1.55 | 86 | H86 | -7.40 | -0.41 | 3.32  |     |      |      |       |       |
| 42 | H42 | 4.76  | 5.45  | -1.64 | 87 | C87 | -5.48 | -1.31 | 3.74  |     |      |      |       |       |
| 43 | C43 | 2.85  | 5.03  | -2.55 | 88 | H88 | -5.90 | -2.12 | 4.33  |     |      |      |       |       |
| 44 | H44 | 3.03  | 5.66  | -3.42 | 89 | C89 | -4.10 | -1.23 | 3.55  |     |      |      |       |       |
| 45 | C45 | 1.65  | 4.33  | -2.44 | 90 | H90 | -3.45 | -1.98 | 3.99  |     |      |      |       |       |



**Table S2** Coordinates for [Tp<sup>Ph2</sup>Cu(S<sub>2</sub>CNBz<sub>2</sub>)] **2**.

|    |     |       |       |       |    |     |       |       |       |     |      |      |       |       |
|----|-----|-------|-------|-------|----|-----|-------|-------|-------|-----|------|------|-------|-------|
| 1  | Cu1 | 0.16  | -0.19 | -0.15 | 46 | H46 | -5.13 | 1.36  | -1.50 | 91  | C91  | 2.96 | 0.24  | 0.04  |
| 2  | S2  | 1.83  | 0.95  | 1.14  | 47 | C47 | 0.15  | -2.76 | -2.88 | 92  | C92  | 5.24 | -0.11 | -0.84 |
| 3  | S3  | 2.25  | -0.69 | -1.24 | 48 | C48 | 0.91  | -3.60 | -2.06 | 93  | H93  | 5.94 | 0.71  | -1.05 |
| 4  | N4  | -1.01 | 1.55  | -0.64 | 49 | H49 | 0.64  | -3.71 | -1.02 | 94  | H94  | 4.68 | -0.31 | -1.75 |
| 5  | N5  | -2.33 | 1.39  | -0.31 | 50 | C50 | 2.00  | -4.30 | -2.58 | 95  | C95  | 6.02 | -1.34 | -0.41 |
| 6  | N6  | -1.12 | -1.32 | -1.27 | 51 | H51 | 2.58  | -4.95 | -1.93 | 96  | C96  | 5.40 | -2.60 | -0.38 |
| 7  | N7  | -2.44 | -1.03 | -1.05 | 52 | C52 | 2.34  | -4.17 | -3.93 | 97  | H97  | 4.36 | -2.69 | -0.68 |
| 8  | N8  | -0.92 | -0.80 | 1.49  | 53 | H53 | 3.19  | -4.71 | -4.33 | 98  | C98  | 6.12 | -3.73 | 0.00  |
| 9  | N9  | -2.25 | -0.53 | 1.41  | 54 | C54 | 1.59  | -3.33 | -4.76 | 99  | H99  | 5.63 | -4.70 | 0.01  |
| 10 | N10 | 4.29  | 0.39  | 0.17  | 55 | H55 | 1.85  | -3.23 | -5.80 | 100 | C100 | 7.46 | -3.62 | 0.37  |
| 11 | B11 | -2.85 | -0.02 | 0.07  | 56 | C56 | 0.49  | -2.64 | -4.24 | 101 | H101 | 8.02 | -4.50 | 0.67  |
| 12 | H12 | -4.03 | 0.01  | 0.17  | 57 | H57 | -0.10 | -1.99 | -4.88 | 102 | C102 | 8.08 | -2.37 | 0.35  |
| 13 | C13 | -0.83 | 2.86  | -0.88 | 58 | C58 | -4.69 | -1.54 | -2.08 | 103 | H103 | 9.13 | -2.28 | 0.62  |
| 14 | C14 | -2.03 | 3.55  | -0.68 | 59 | C59 | -5.30 | -1.21 | -3.30 | 104 | C104 | 7.36 | -1.24 | -0.04 |
| 15 | H15 | -2.22 | 4.60  | -0.86 | 60 | H60 | -4.68 | -0.95 | -4.15 | 105 | H105 | 7.86 | -0.27 | -0.07 |
| 16 | C16 | -2.97 | 2.59  | -0.33 | 61 | C61 | -6.69 | -1.19 | -3.42 | 106 | C106 | 4.90 | 1.01  | 1.36  |
| 17 | C17 | -1.07 | -2.10 | -2.37 | 62 | H62 | -7.14 | -0.92 | -4.37 | 107 | H107 | 5.62 | 0.30  | 1.77  |
| 18 | C18 | -2.37 | -2.28 | -2.88 | 63 | C63 | -7.49 | -1.51 | -2.33 | 108 | H108 | 4.11 | 1.14  | 2.10  |
| 19 | H19 | -2.65 | -2.90 | -3.72 | 64 | H64 | -8.57 | -1.50 | -2.42 | 109 | C109 | 5.59 | 2.33  | 1.08  |
| 20 | C20 | -3.21 | -1.60 | -2.02 | 65 | C65 | -6.89 | -1.85 | -1.11 | 110 | C110 | 6.91 | 2.53  | 1.49  |
| 21 | C21 | -0.70 | -1.41 | 2.67  | 66 | H66 | -7.51 | -2.11 | -0.25 | 111 | H111 | 7.45 | 1.73  | 1.98  |
| 22 | C22 | -1.91 | -1.52 | 3.37  | 67 | C67 | -5.50 | -1.87 | -0.99 | 112 | C112 | 7.54 | 3.76  | 1.27  |
| 23 | H23 | -2.07 | -1.97 | 4.34  | 68 | H68 | -5.05 | -2.16 | -0.05 | 113 | H113 | 8.57 | 3.90  | 1.60  |
| 24 | C24 | -2.88 | -0.96 | 2.54  | 69 | C69 | 0.62  | -1.90 | 3.12  | 114 | C114 | 6.86 | 4.80  | 0.64  |
| 25 | C25 | 0.43  | 3.43  | -1.39 | 70 | C70 | 0.94  | -1.85 | 4.49  | 115 | H115 | 7.35 | 5.75  | 0.47  |
| 26 | C26 | 1.25  | 2.73  | -2.29 | 71 | H71 | 0.24  | -1.40 | 5.19  | 116 | C116 | 5.54 | 4.60  | 0.22  |
| 27 | H27 | 0.97  | 1.72  | -2.58 | 72 | C72 | 2.16  | -2.35 | 4.95  | 117 | H117 | 5.00 | 5.40  | -0.27 |
| 28 | C28 | 2.39  | 3.32  | -2.82 | 73 | H73 | 2.39  | -2.29 | 6.01  | 118 | C118 | 4.91 | 3.38  | 0.44  |
| 29 | H29 | 3.01  | 2.76  | -3.52 | 74 | C74 | 3.08  | -2.90 | 4.06  | 119 | H119 | 3.88 | 3.24  | 0.12  |
| 30 | C30 | 2.74  | 4.63  | -2.47 | 75 | H75 | 4.03  | -3.28 | 4.41  |     |      |      |       |       |
| 31 | H31 | 3.62  | 5.09  | -2.90 | 76 | C76 | 2.76  | -2.96 | 2.70  |     |      |      |       |       |
| 32 | C32 | 1.93  | 5.34  | -1.57 | 77 | H77 | 3.47  | -3.38 | 1.99  |     |      |      |       |       |
| 33 | H33 | 2.19  | 6.36  | -1.30 | 78 | C78 | 1.54  | -2.47 | 2.23  |     |      |      |       |       |
| 34 | C34 | 0.79  | 4.74  | -1.04 | 79 | H79 | 1.30  | -2.53 | 1.18  |     |      |      |       |       |
| 35 | H35 | 0.18  | 5.29  | -0.33 | 80 | C80 | -4.33 | -0.87 | 2.82  |     |      |      |       |       |
| 36 | C36 | -4.41 | 2.82  | -0.09 | 81 | C81 | -5.04 | 0.33  | 2.68  |     |      |      |       |       |
| 37 | C37 | -4.79 | 3.82  | 0.82  | 82 | H82 | -4.54 | 1.23  | 2.34  |     |      |      |       |       |
| 38 | H38 | -4.03 | 4.37  | 1.36  | 83 | C83 | -6.40 | 0.39  | 2.99  |     |      |      |       |       |
| 39 | C39 | -6.14 | 4.12  | 1.03  | 84 | H84 | -6.94 | 1.32  | 2.87  |     |      |      |       |       |
| 40 | H40 | -6.42 | 4.90  | 1.73  | 85 | C85 | -7.06 | -0.75 | 3.46  |     |      |      |       |       |
| 41 | C41 | -7.13 | 3.41  | 0.34  | 86 | H86 | -8.12 | -0.70 | 3.70  |     |      |      |       |       |
| 42 | H42 | -8.18 | 3.64  | 0.50  | 87 | C87 | -6.36 | -1.95 | 3.61  |     |      |      |       |       |
| 43 | C43 | -6.76 | 2.41  | -0.57 | 88 | H88 | -6.87 | -2.84 | 3.97  |     |      |      |       |       |
| 44 | H44 | -7.51 | 1.86  | -1.11 | 89 | C89 | -5.00 | -2.00 | 3.29  |     |      |      |       |       |
| 45 | C45 | -5.41 | 2.12  | -0.78 | 90 | H90 | -4.46 | -2.94 | 3.40  |     |      |      |       |       |

**Table S3** Coordinates for [Tp<sup>Ph2</sup>Cu(S<sub>2</sub>CN(CH<sub>2</sub>)<sub>4</sub>)] **3**.

|    |     |       |       |       |
|----|-----|-------|-------|-------|
| 1  | Cu1 | 1.11  | -0.23 | 0.01  |
| 2  | S2  | 2.64  | 0.50  | -1.70 |
| 3  | S3  | 3.28  | -0.37 | 1.02  |
| 4  | N4  | -1.40 | -0.65 | 1.34  |
| 5  | N5  | -0.08 | -0.92 | 1.52  |
| 6  | N6  | -1.33 | 1.44  | -0.08 |
| 7  | N7  | 0.02  | 1.63  | 0.06  |
| 8  | N8  | -1.44 | -0.89 | -1.17 |
| 9  | N9  | -0.13 | -1.24 | -1.28 |
| 10 | N10 | 5.09  | 0.70  | -0.66 |
| 11 | C11 | -2.09 | -0.90 | 2.49  |
| 12 | C12 | -1.18 | -1.33 | 3.44  |
| 13 | H13 | -1.40 | -1.67 | 4.44  |
| 14 | C14 | 0.07  | -1.35 | 2.79  |
| 15 | C15 | -1.94 | 2.63  | -0.37 |
| 16 | C16 | -0.95 | 3.60  | -0.44 |
| 17 | H17 | -1.10 | 4.66  | -0.59 |
| 18 | C18 | 0.25  | 2.94  | -0.15 |
| 19 | C19 | -2.19 | -1.61 | -2.06 |
| 20 | C20 | -1.31 | -2.44 | -2.76 |
| 21 | H21 | -1.57 | -3.14 | -3.53 |
| 22 | C22 | -0.03 | -2.18 | -2.23 |
| 23 | C23 | -3.56 | -0.77 | 2.66  |
| 24 | C24 | -4.05 | -0.08 | 3.78  |
| 25 | H25 | -3.36 | 0.39  | 4.47  |
| 26 | C26 | -5.43 | 0.02  | 4.00  |
| 27 | H27 | -5.80 | 0.55  | 4.87  |
| 28 | C28 | -6.32 | -0.58 | 3.11  |
| 29 | H29 | -7.39 | -0.50 | 3.28  |
| 30 | C30 | -5.84 | -1.27 | 2.00  |
| 31 | H31 | -6.53 | -1.74 | 1.30  |
| 32 | C32 | -4.47 | -1.37 | 1.77  |
| 33 | H33 | -4.10 | -1.92 | 0.92  |
| 34 | C34 | -3.39 | 2.84  | -0.54 |
| 35 | C35 | -3.85 | 3.56  | -1.65 |
| 36 | H36 | -3.14 | 3.90  | -2.40 |
| 37 | C37 | -5.21 | 3.84  | -1.81 |
| 38 | H38 | -5.55 | 4.40  | -2.68 |
| 39 | C39 | -6.13 | 3.40  | -0.86 |
| 40 | H40 | -7.19 | 3.62  | -0.98 |
| 41 | C41 | -5.69 | 2.69  | 0.25  |
| 42 | H42 | -6.39 | 2.34  | 1.00  |
| 43 | C43 | -4.33 | 2.41  | 0.42  |
| 44 | H44 | -3.99 | 1.87  | 1.30  |
| 45 | C45 | -3.65 | -1.53 | -2.23 |

|    |     |       |       |       |
|----|-----|-------|-------|-------|
| 46 | C46 | -4.39 | -2.72 | -2.29 |
| 47 | H47 | -3.88 | -3.67 | -2.17 |
| 48 | C48 | -5.77 | -2.69 | -2.49 |
| 49 | H49 | -6.33 | -3.62 | -2.53 |
| 50 | C50 | -6.43 | -1.47 | -2.63 |
| 51 | H51 | -7.51 | -1.45 | -2.79 |
| 52 | C52 | -5.70 | -0.28 | -2.59 |
| 53 | H53 | -6.20 | 0.67  | -2.70 |
| 54 | C54 | -4.32 | -0.31 | -2.39 |
| 55 | H55 | -3.77 | 0.62  | -2.37 |
| 56 | C56 | 1.32  | -1.87 | 3.37  |
| 57 | C57 | 2.05  | -2.89 | 2.74  |
| 58 | H58 | 1.71  | -3.27 | 1.78  |
| 59 | C59 | 3.17  | -3.44 | 3.35  |
| 60 | H60 | 3.72  | -4.23 | 2.85  |
| 61 | C61 | 3.59  | -2.98 | 4.60  |
| 62 | H62 | 4.47  | -3.40 | 5.07  |
| 63 | C63 | 2.88  | -1.96 | 5.24  |
| 64 | H64 | 3.20  | -1.60 | 6.21  |
| 65 | C65 | 1.75  | -1.42 | 4.63  |
| 66 | H66 | 1.19  | -0.63 | 5.13  |
| 67 | C67 | 1.58  | 3.57  | 0.01  |
| 68 | C68 | 2.44  | 3.21  | 1.05  |
| 69 | H69 | 2.15  | 2.42  | 1.74  |
| 70 | C70 | 3.67  | 3.85  | 1.21  |
| 71 | H71 | 4.32  | 3.56  | 2.03  |
| 72 | C72 | 4.05  | 4.87  | 0.33  |
| 73 | H73 | 5.00  | 5.38  | 0.47  |
| 74 | C74 | 3.19  | 5.24  | -0.70 |
| 75 | H75 | 3.48  | 6.04  | -1.39 |
| 76 | C76 | 1.97  | 4.60  | -0.86 |
| 77 | H77 | 1.31  | 4.88  | -1.68 |
| 78 | C78 | 1.22  | -2.85 | -2.62 |
| 79 | C79 | 2.23  | -3.12 | -1.68 |
| 80 | H80 | 2.11  | -2.80 | -0.65 |
| 81 | C81 | 3.39  | -3.80 | -2.06 |
| 82 | H82 | 4.16  | -4.00 | -1.32 |
| 83 | C83 | 3.56  | -4.22 | -3.38 |
| 84 | H84 | 4.46  | -4.75 | -3.67 |
| 85 | C85 | 2.56  | -3.96 | -4.32 |
| 86 | H86 | 2.68  | -4.28 | -5.35 |
| 87 | C87 | 1.40  | -3.28 | -3.94 |
| 88 | H88 | 0.64  | -3.06 | -4.68 |
| 89 | C89 | 3.82  | 0.32  | -0.47 |
| 90 | C90 | 5.59  | 1.31  | -1.90 |

|     |      |       |       |       |
|-----|------|-------|-------|-------|
| 91  | H91  | 5.14  | 2.31  | -2.02 |
| 92  | H92  | 5.29  | 0.71  | -2.76 |
| 93  | C93  | 7.10  | 1.38  | -1.69 |
| 94  | H94  | 7.57  | 0.44  | -2.02 |
| 95  | H95  | 7.56  | 2.20  | -2.25 |
| 96  | C96  | 7.25  | 1.53  | -0.17 |
| 97  | H97  | 7.05  | 2.57  | 0.13  |
| 98  | H98  | 8.23  | 1.25  | 0.21  |
| 99  | C99  | 6.14  | 0.62  | 0.38  |
| 100 | H100 | 6.47  | -0.42 | 0.49  |
| 101 | H101 | 5.73  | 0.95  | 1.34  |
| 102 | B102 | -1.90 | 0.00  | 0.02  |
| 103 | H103 | -3.08 | 0.06  | 0.02  |
